# Supplementary material
Source: PubMed Central journal article supplement (PMC4147782)
Supplement: NIHMS609587-supplement-15.pdf [file NIHMS609587-supplement-15.pdf]

**a**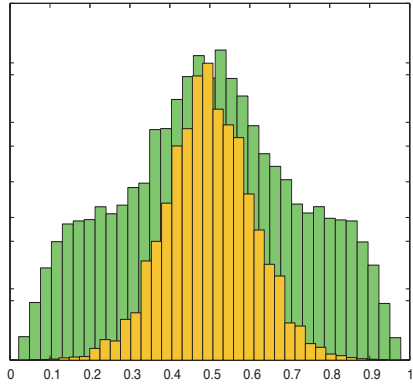**b**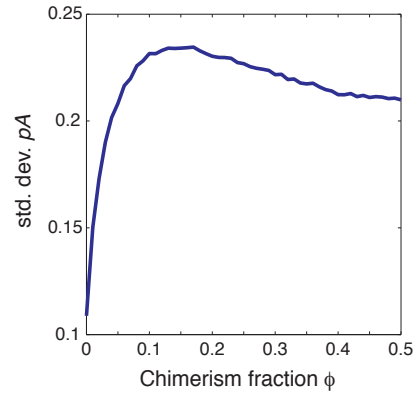

**Supplementary Figure 2 | Summary of Chimerism Analysis Data.** **a.** Simulated distributions of the proportion of allele A reads out of the total number of reads at a locus for a marmoset with chimeric fraction  $\Phi = 0.33$  (green) and  $\Phi = 0$  (i.e., not chimeric; yellow). **b.** Standard deviation in the proportion of allele A reads across loci vs. chimerism fraction  $\Phi$ , by simulation. Excess variance in pA is expected for reads from chimeric samples.
