# Supplementary material
Source: PubMed Central journal article supplement (PMC4147782)
Supplement: NIHMS609587-supplement-19.pdf [file NIHMS609587-supplement-19.pdf]

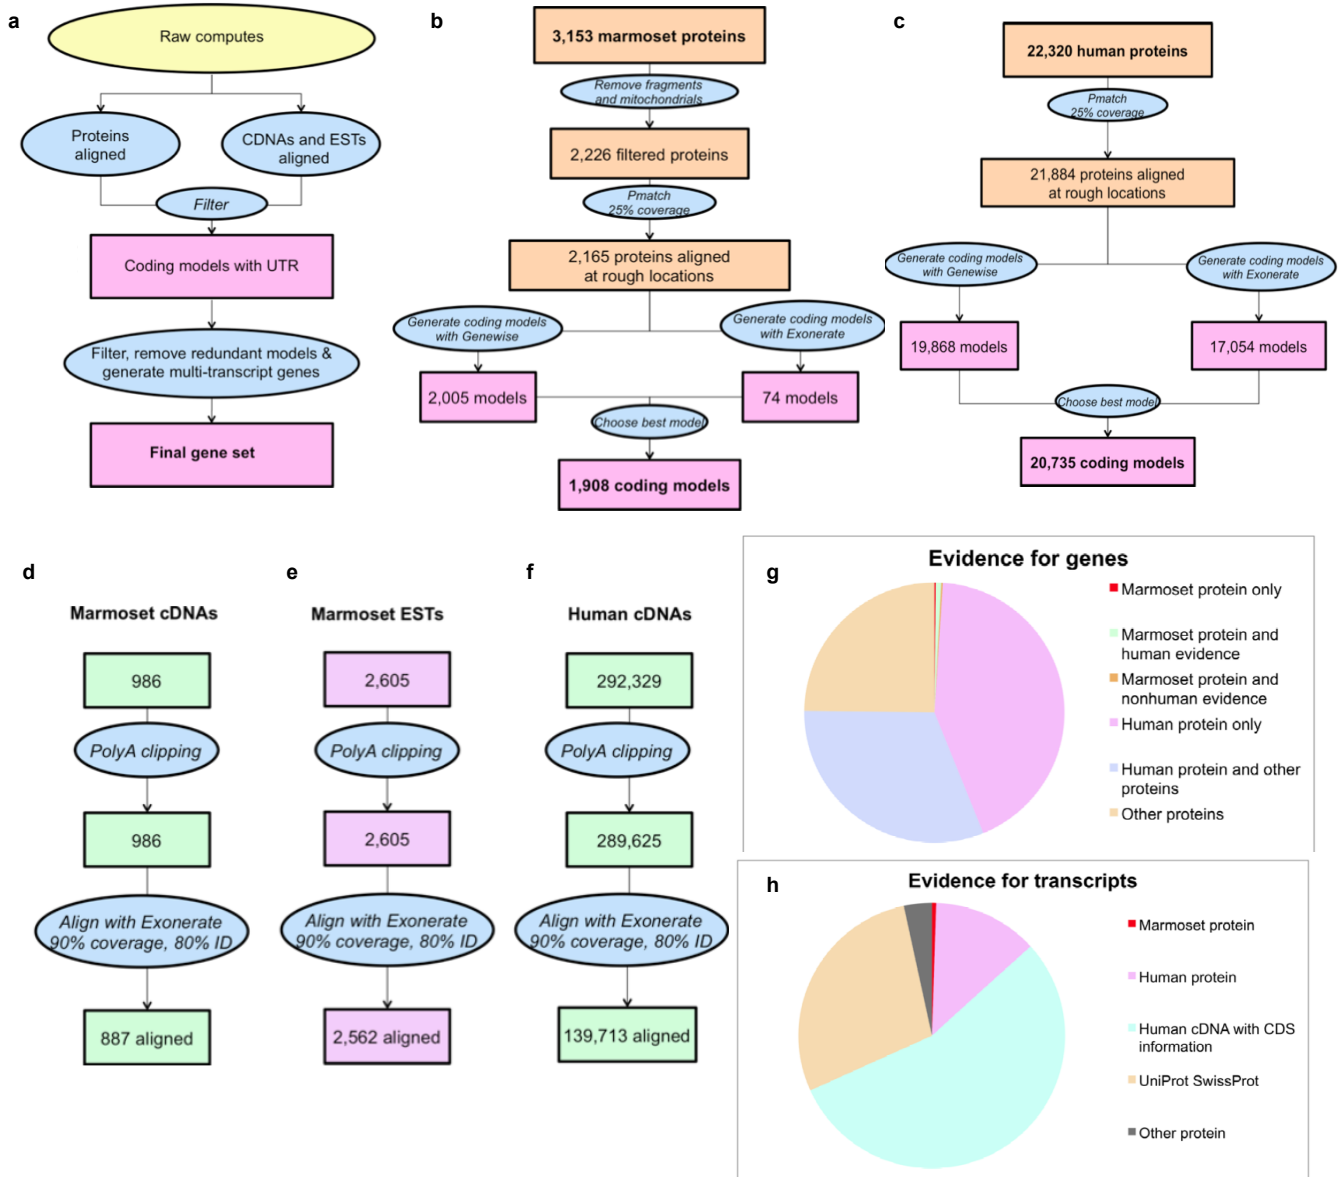

**Supplementary Figure 6 | Summary of Gene Annotation and Gene Families.** a. Summary of Ensembl marmoset gene annotation project. The raw computes 47% repeat masked, 25,582 Uniprot aligned. Proteins aligned from **b.** marmoset and **c.** human generated some models, others were generated with expressed data including **d.** marmoset cDNAs **e.** marmoset ESTs, and **f.** human cDNAs. Evidence for the final gene set **g.** genes and **h.** transcripts. Uniprot protein alignments (99,342 of 112,776) generated 22,897 of 31,863 models with UTRs (not shown).
