# Supplementary material
Source: PubMed Central journal article supplement (PMC4147782)
Supplement: NIHMS609587-supplement-21.pdf [file NIHMS609587-supplement-21.pdf]

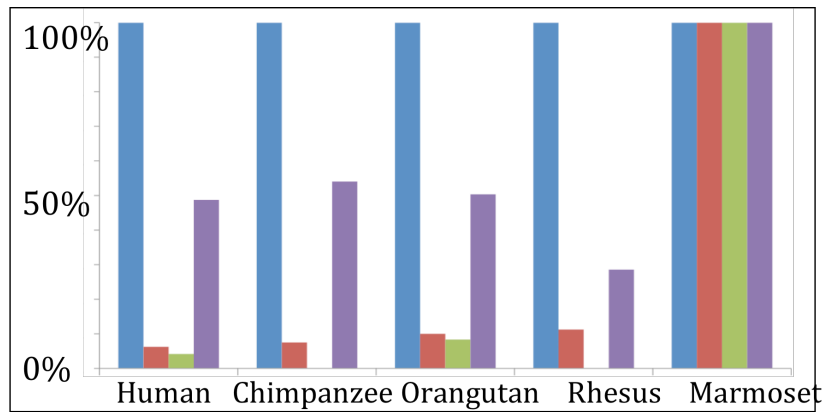

| Key                   |        |
|-----------------------|--------|
| Let-7 Family          | Blue   |
| Chromosome 22 Cluster | Red    |
| Chromosome X Cluster  | Green  |
| Other known miRNAs    | Purple |

**Supplementary Figure 8 | Conservation of miRNAs across four anthropoid primates.** Marmoset miRNAs were mapped on the marmoset (calJac3) genome and evaluated against four anthropoid primates including Human (hg18), Chimpanzee (panTro2), Orangutan (ponAbe2) and Rhesus macaque (rhema2). The fraction of marmoset miRNAs that are perfectly conserved in different primates are plotted. Total number of miRNAs in each group are Let-7 family (8), Chr. 22 cluster (71), Chr. X cluster (22), All others (673).
