# Supplementary material
Source: PubMed Central journal article supplement (PMC4147782)
Supplement: NIHMS609587-supplement-22.pdf [file NIHMS609587-supplement-22.pdf]

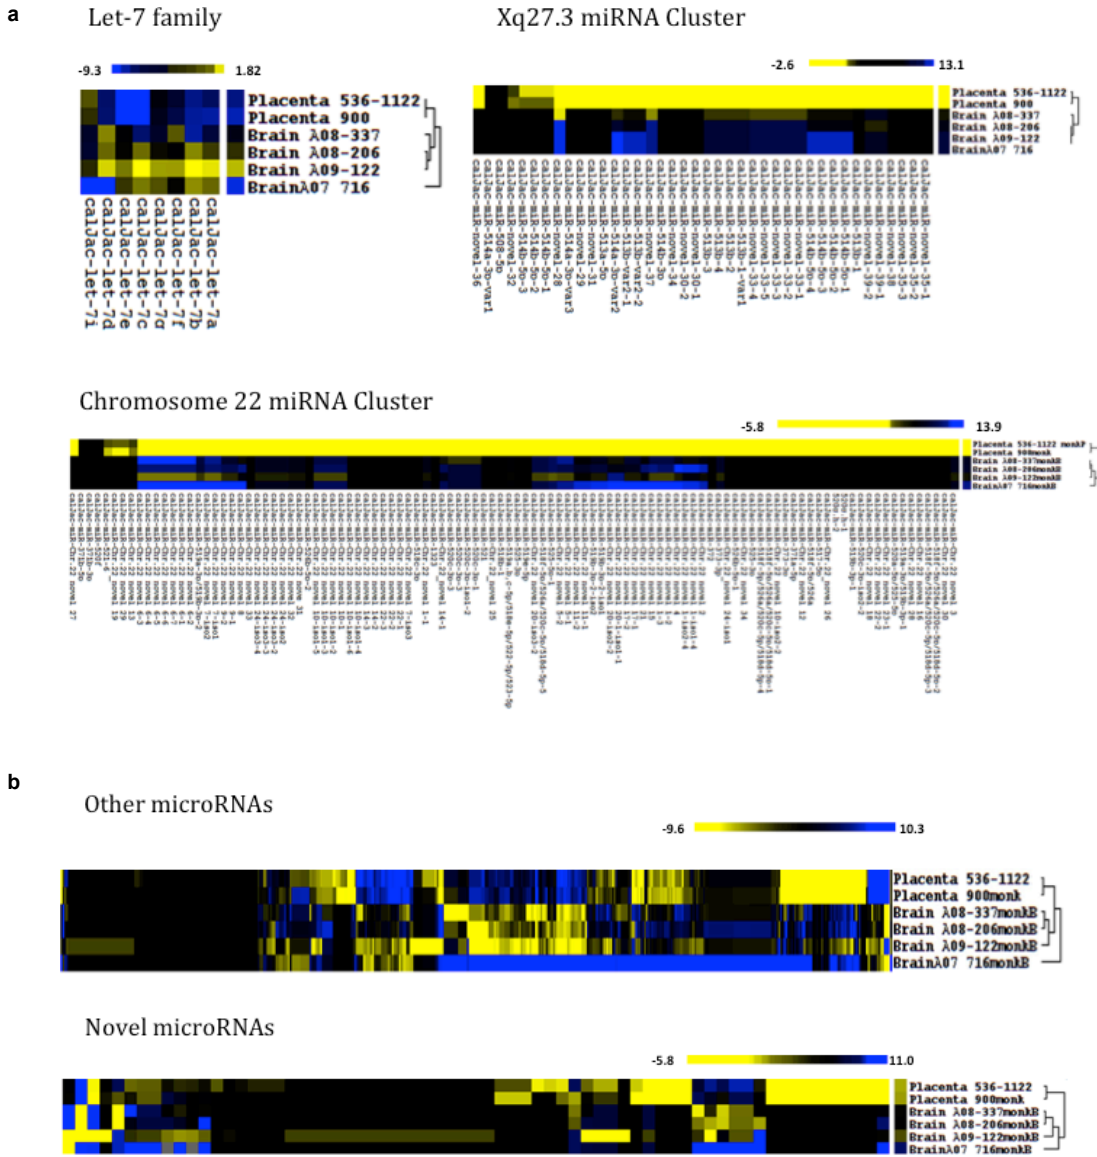

**Supplementary Figure 9 | Analysis of miRNAs and their targeted mRNAs.** **a.** Expression in placenta and brain of Let-7, Chr. X, Chr. 22, micro RNAs. These heat maps show the relative expression levels of miRNAs in the small RNA fraction isolated from placenta and brain. Brain samples from four different brain samples are on the bottom (A08-337, A08-206, A09-122 and A07-716), samples from two placentas are on the top (S36-1122 and 900). **b.** Expression of novel and all other miRNAs in placenta and brain. This heat map shows the relative expression levels of miRNAs not shown in (a): Other microRNAs and microRNAs not found in other species (Novel micro RNAs) samples as in (a).
