# Supplementary material
Source: PubMed Central journal article supplement (PMC4147782)
Supplement: NIHMS609587-supplement-24.pdf [file NIHMS609587-supplement-24.pdf]

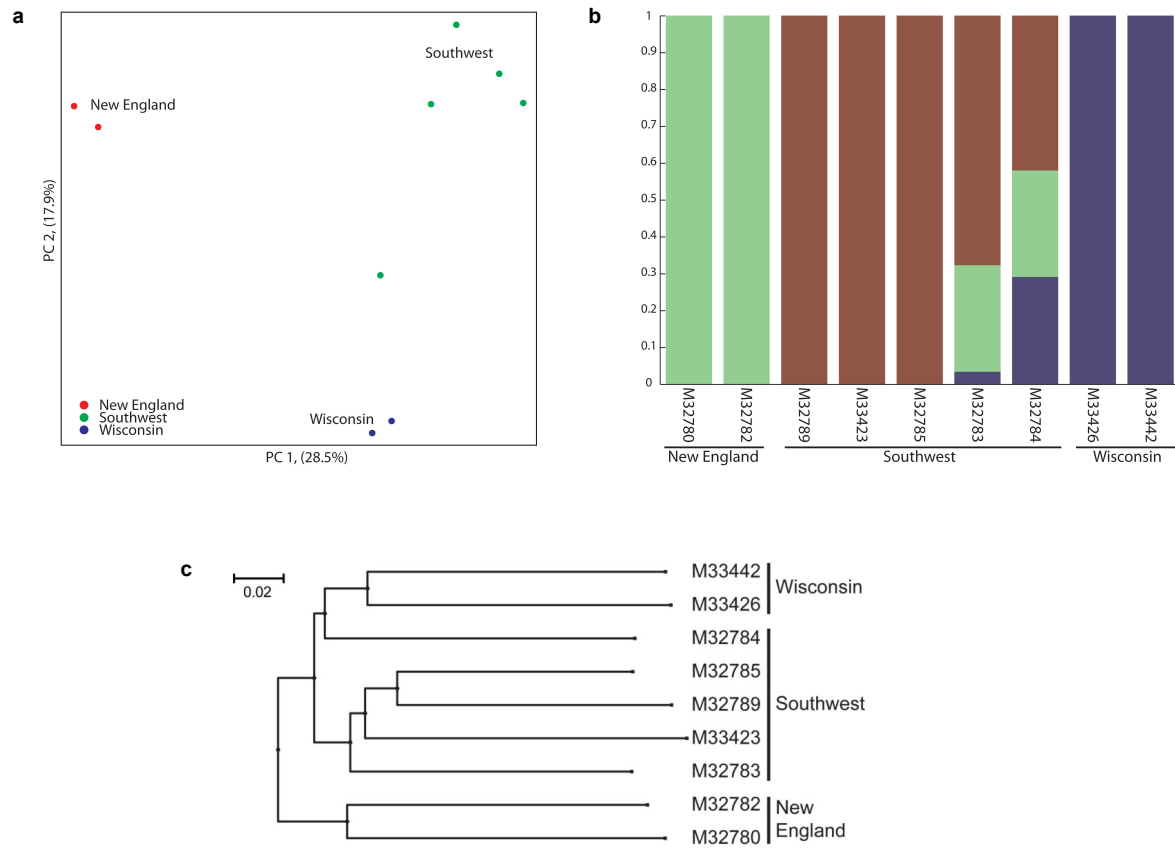

**Supplementary Figure 11 | Summary of SNP Variation Analyses.** **a.** Principal component analysis of SNPs separates 9 animals from the three primate research centers; Southwest (green), New England (red), and Wisconsin (blue). **b.** Admixture among these 9 marmosets in the US. Two animals on left are from New England RPRC, two on right from Wisconsin NPRC and five in middle from Southwest NPRC. **c.** Neighbor joining tree using distance matrix among these 9 US marmosets.
