# Supplementary material
Source: PubMed Central journal article supplement (PMC4147782)
Supplement: NIHMS609587-supplement-25.pdf [file NIHMS609587-supplement-25.pdf]

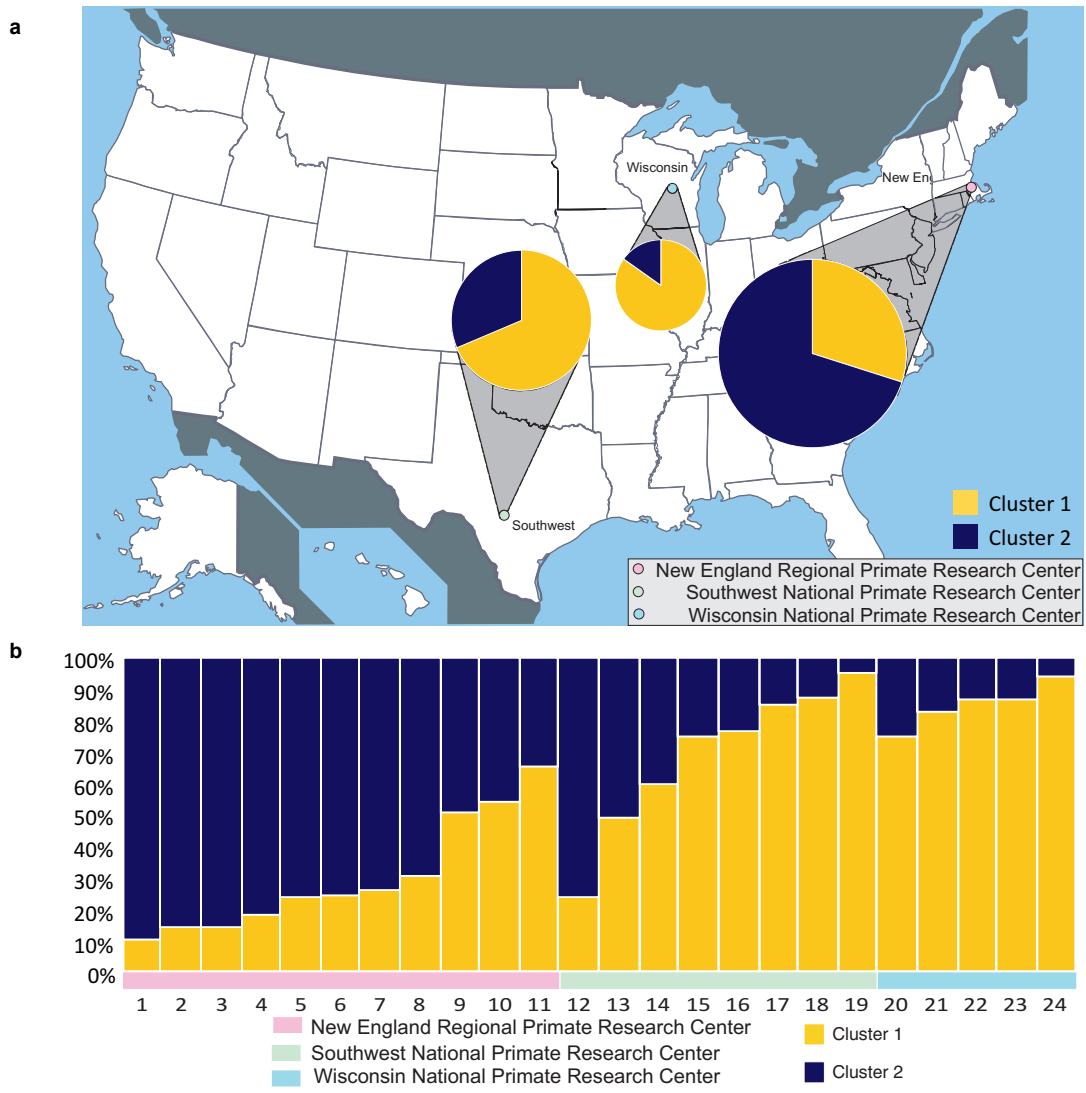

**Supplementary Figure 12 | Summary of *Alu* Variation Analyses.** **a.** Pie charts show the overall diversity of the included common marmosets for each Primate Center separately. The size of the pie charts is proportional to the number of individuals included in the analysis. **b.** Shown is the population structure for each common marmoset individually. The numbers below the bars refer to the common marmoset individuals in (**Supplementary Table 41**). Some individuals are primarily assigned to one cluster while others show varying degrees of admixture between the two populations.
