# Supplementary material
Source: PubMed Central journal article supplement (PMC4147782)

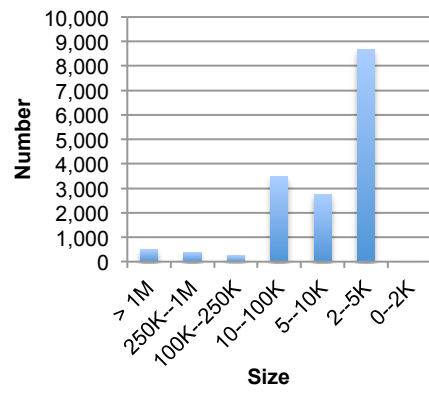

**Supplementary Figure 1 | Assembly Scaffolds.** Sizes of scaffolds in the assembled genome.

Supplement: NIHMS609587-supplement-14.pdf [file NIHMS609587-supplement-14.pdf]
